# Supplementary material for: Identification of Key Genes and Pathways Associated with Chemotherapy and Radiotherapy Sensitivity in Locally Advanced Cervical Cancer
Source: Research Square preprint supplement (doi:10.21203/rs.3.rs-131689/v1), 2020-12-23
Supplement: Supplementary file 1 [file ed809f95d7ce047455d7b13c.xlsx]

## Sheet: Genes of the blue module
datSummary	colorNEW	Correlation with trait	p-value
MTA1	blue	0.289805	0.00258434
AP3D1	blue	0.28847	0.00271051
CYB5R3	blue	0.216809	0.0255924
PHC2	blue	0.205466	0.0346082
SPPL2B	blue	0.184591	0.0581901
SGTA	blue	0.182634	0.0609542
NAGLU	blue	0.179064	0.0662703
TBC1D10B	blue	0.162618	0.0958107
SLC5A2	blue	0.15506	0.112483
ARMC6	blue	0.131031	0.180624
TAGLN	blue	0.129019	0.187471
C21orf58	blue	0.0914488	0.351174

## Sheet: Genes-Traits
	CR	NR	p-value
USP48	-0.369319	0.369319	9.78e-05
TPR	-0.353087	0.353087	0.000205246
PTK7	0.315136	-0.315136	0.00100078
TSPYL3	0.302019	-0.302019	0.00165282
TRNT1	-0.29633	0.29633	0.0020402
MTA1	-0.289805	0.289805	0.00258434
AP3D1	-0.28847	0.28847	0.00271051
BCL2L13	-0.282354	0.282354	0.00336284
POGZ	-0.280376	0.280376	0.0036022
YPEL4	-0.273936	0.273936	0.00449056
IGHG1	0.273725	-0.273725	0.0045228
SMARCC2	-0.26656	0.26656	0.00574437
CAMKK2	-0.26304	0.26304	0.00644565
RFNG	-0.259881	0.259881	0.00713868
KLF6	-0.258673	0.258673	0.00742056
FGFR1	0.252282	-0.252282	0.00908209
LSM12	-0.246581	0.246581	0.0108319
TTLL3	-0.242618	0.242618	0.0122158
IGFBP4	0.240019	-0.240019	0.0132054
FCN3	0.239996	-0.239996	0.0132142
LMBR1L	0.237298	-0.237298	0.0143152
APTX	-0.235621	0.235621	0.015039
WDR67	-0.231758	0.231758	0.0168278
FASTK	-0.231453	0.231453	0.0169766
JARID2	-0.231328	0.231328	0.0170381
SOX4	-0.230263	0.230263	0.017568
PEF1	-0.226402	0.226402	0.0196112
SLIT2	0.225938	-0.225938	0.01987
IGKV1-5	0.223785	-0.223785	0.0211098
ATM	0.223518	-0.223518	0.0212682
HEY1	0.223516	-0.223516	0.0212689
ALS2CR14	0.220971	-0.220971	0.0228295
UCRC	-0.2197	0.2197	0.0236448
USP22	0.219452	-0.219452	0.0238066
CTSF	-0.219118	0.219118	0.0240264
HNRPDL	-0.217673	0.217673	0.0249964
U2AF1	-0.2173	0.2173	0.0252523
CYB5R3	-0.216809	0.216809	0.0255924
MRPS31	-0.216491	0.216491	0.0258145
CDS2	0.215072	-0.215072	0.0268267
GUCY1A3	0.214649	-0.214649	0.0271355
FES	-0.212146	0.212146	0.0290214
FAM54B	-0.212124	0.212124	0.029039
SOD1	-0.211488	0.211488	0.0295351
C1orf112	-0.211428	0.211428	0.0295825
SLC25A25	0.209245	-0.209245	0.0313455
UGDH	0.208461	-0.208461	0.0320006
GYS1	-0.206455	0.206455	0.0337274
TXNRD2	0.205968	-0.205968	0.034159
PHC2	-0.205466	0.205466	0.0346082
PARP1	-0.20536	0.20536	0.0347035
TLR9	-0.204581	0.204581	0.0354119
ATF4	-0.204516	0.204516	0.0354715
CRELD2	-0.204513	0.204513	0.0354745
TGOLN2	-0.204308	0.204308	0.0356626
NEDD9	0.204224	-0.204224	0.0357408
SHARPIN	-0.203522	0.203522	0.0363939
NRP2	0.202079	-0.202079	0.0377698
DPH2	-0.200451	0.200451	0.0393737
KHSRP	-0.199855	0.199855	0.0399754
GNPTAB	-0.19984	0.19984	0.03999
ABCA2	-0.199289	0.199289	0.0405536
OGDH	-0.199135	0.199135	0.0407116
ATP6AP1	-0.197838	0.197838	0.0420672
NUDT3	0.197326	-0.197326	0.0426125
BEXL1	0.196684	-0.196684	0.0433049
HPSE2	0.196528	-0.196528	0.0434742
FBLN5	0.196435	-0.196435	0.0435758
GRB10	-0.194283	0.194283	0.0459771
CASP8	-0.193316	0.193316	0.0470911
WHSC1L1	-0.192063	0.192063	0.0485677
GALNACT-2	0.191745	-0.191745	0.0489487
